# Supplementary material for: Monosulfonated dibenzo-24-crown-8 and its properties
Source: Royal Society of Chemistry journal article supplement (doi:10.1039/d2ob00851c), 2022-01-01
Supplement: d2ob00851c1.pdf [file d2ob00851c1.pdf]

Electronic Supporting Information (ESI)

MONOSULFONATED DIBENZO-24-CROWN-8  
AND ITS PROPERTIES

M. Woźny<sup>a\*</sup>, D. Trzybiński<sup>b</sup>, K. Dąbrowa<sup>a</sup>, J. Narodowicz<sup>a</sup>, K. Woźniak<sup>b</sup>

<sup>a</sup> Institute of Organic Chemistry, Polish Academy of Sciences,  
Kasprzaka 44/52, 01-224 Warsaw, Poland

<sup>b</sup> Biological and Chemical Research Centre, Chemistry Department, University of Warsaw,  
Żwirki i Wigury 101, 02-089 Warszawa, Poland

\* mateusz.wozny@icho.edu.pl

**Table 1S.** Crystal data and structure refinement details for investigated compounds.

| Compound                                                     | SDB24C8-K <sup>+</sup>                                                       | SDB24C8-H <sub>3</sub> O <sup>+</sup>                                        |
|--------------------------------------------------------------|------------------------------------------------------------------------------|------------------------------------------------------------------------------|
| Empirical formula                                            | C <sub>24</sub> H <sub>35</sub> KO <sub>13</sub> S                           | C <sub>24</sub> H <sub>34</sub> O <sub>12</sub> S                            |
| Formula weight                                               | 602.68                                                                       | 546.57                                                                       |
| Temperature/K                                                | 100(2)                                                                       | 100(2)                                                                       |
| Crystal system                                               | triclinic                                                                    | triclinic                                                                    |
| Space group                                                  | <i>P</i> -1                                                                  | <i>P</i> -1                                                                  |
| <i>a</i> /Å                                                  | 9.5640(5)                                                                    | 9.3346(4)                                                                    |
| <i>b</i> /Å                                                  | 11.4132(5)                                                                   | 11.4965(5)                                                                   |
| <i>c</i> /Å                                                  | 14.4900(7)                                                                   | 14.0008(5)                                                                   |
| $\alpha$ /°                                                  | 89.466(4)                                                                    | 68.283(4)                                                                    |
| $\beta$ /°                                                   | 70.873(5)                                                                    | 88.338(3)                                                                    |
| $\gamma$ /°                                                  | 66.708(5)                                                                    | 66.351(4)                                                                    |
| Volume/Å <sup>3</sup>                                        | 1359.32(13)                                                                  | 1265.99(10)                                                                  |
| <i>Z</i>                                                     | 2                                                                            | 2                                                                            |
| $\rho_{\text{calc}}/\text{cm}^3$                             | 1.472                                                                        | 1.434                                                                        |
| $\mu/\text{mm}^{-1}$                                         | 3.017                                                                        | 1.706                                                                        |
| <i>F</i> (000)                                               | 636.0                                                                        | 580.0                                                                        |
| Crystal size/mm <sup>3</sup>                                 | 0.28 × 0.17 × 0.15                                                           | 0.50 × 0.14 × 0.14                                                           |
| Radiation                                                    | CuK $\alpha$ ( $\lambda$ = 1.54184)                                          | CuK $\alpha$ ( $\lambda$ = 1.54184)                                          |
| 2 $\theta$ range for data collection/°                       | 6.52 to 134.134                                                              | 6.864 to 134.118                                                             |
| Index ranges                                                 | -9 ≤ <i>h</i> ≤ 11, -10 ≤ <i>k</i> ≤ 13, -16 ≤ <i>l</i> ≤ 17                 | -11 ≤ <i>h</i> ≤ 11, -13 ≤ <i>k</i> ≤ 13, -16 ≤ <i>l</i> ≤ 16                |
| Reflections collected                                        | 8668                                                                         | 17259                                                                        |
| Independent reflections                                      | 4847 [ <i>R</i> <sub>int</sub> = 0.0204, <i>R</i> <sub>sigma</sub> = 0.0278] | 4517 [ <i>R</i> <sub>int</sub> = 0.0248, <i>R</i> <sub>sigma</sub> = 0.0179] |
| Data/restraints/parameters                                   | 4847/6/387                                                                   | 4517/17/439                                                                  |
| Goodness-of-fit on <i>F</i> <sup>2</sup>                     | 1.030                                                                        | 1.027                                                                        |
| Final <i>R</i> indexes [ <i>I</i> ≥ 2 $\sigma$ ( <i>I</i> )] | <i>R</i> <sub>1</sub> = 0.0310, w <i>R</i> <sub>2</sub> = 0.0798             | <i>R</i> <sub>1</sub> = 0.0421, w <i>R</i> <sub>2</sub> = 0.1080             |
| Final <i>R</i> indexes [all data]                            | <i>R</i> <sub>1</sub> = 0.0329, w <i>R</i> <sub>2</sub> = 0.0817             | <i>R</i> <sub>1</sub> = 0.0439, w <i>R</i> <sub>2</sub> = 0.1098             |
| Largest diff. peak/hole / e Å <sup>-3</sup>                  | 0.36/-0.48                                                                   | 0.40/-0.49                                                                   |

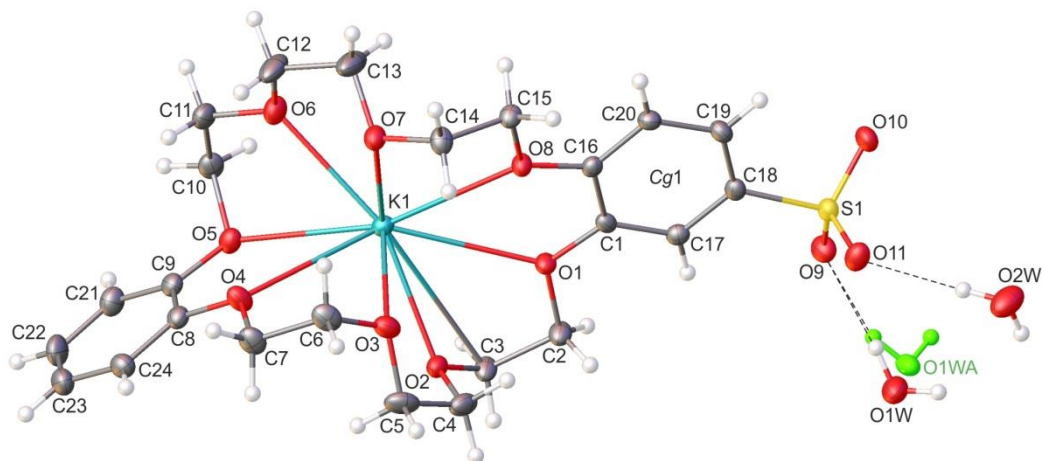

**Figure 1S.** Asymmetric unit of the crystal lattice of **SDB24C8-K<sup>+</sup>**. Displacement ellipsoids are drawn at the 50% probability level. Hydrogen atoms are shown as small spheres of arbitrary radius. The hydrogen bonds are represented by dashed lines. Minor parts of the disordered fragments are coloured in green. *Cg1* denotes the geometric centre of gravity of the aromatic ring delineated by the C1/C16/C20–C17 atoms.

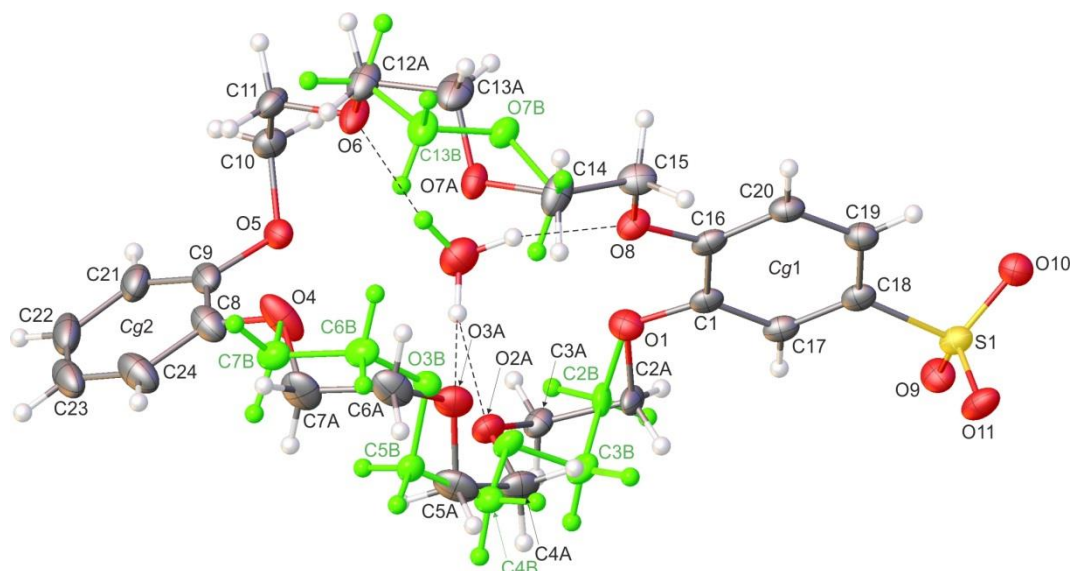

**Figure 2S.** Asymmetric unit of the crystal lattice of **SDB24C8-H<sub>3</sub>O<sup>+</sup>**. Displacement ellipsoids are drawn at the 50% probability level. Hydrogen atoms are shown as small spheres of arbitrary radius. The hydrogen bonds are represented by dashed lines. Minor parts of the disordered fragments are coloured in green. *Cg1* and *Cg2* denote the geometric centers of gravity of the aromatic rings delineated by the C1/C16/C20–C17 and C8–C9/C21–C24 atoms, respectively.

**Table 2S.** Bond lengths for **SDB24C8-K<sup>+</sup>**.

| Atom | Atom | Length/Å   | Atom | Atom             | Length/Å   |
|------|------|------------|------|------------------|------------|
| C1   | C16  | 1.408(2)   | C16  | C20              | 1.385(2)   |
| C1   | C17  | 1.388(2)   | C16  | O8               | 1.3673(18) |
| C1   | O1   | 1.3665(18) | C17  | C18              | 1.393(2)   |
| C2   | C3   | 1.508(2)   | C18  | C19              | 1.381(2)   |
| C2   | O1   | 1.4324(18) | C18  | S1               | 1.7741(15) |
| C3   | K1   | 3.5027(16) | C19  | C20              | 1.396(2)   |
| C3   | O2   | 1.425(2)   | C21  | C22              | 1.391(3)   |
| C4   | C5   | 1.497(3)   | C22  | C23              | 1.379(3)   |
| C4   | O2   | 1.416(2)   | C23  | C24              | 1.391(2)   |
| C5   | O3   | 1.434(2)   | K1   | O1               | 3.0677(11) |
| C6   | C7   | 1.510(2)   | K1   | O2               | 2.7363(11) |
| C6   | O3   | 1.423(2)   | K1   | O3               | 2.8187(11) |
| C7   | O4   | 1.4359(19) | K1   | O4               | 3.1664(11) |
| C8   | C9   | 1.400(2)   | K1   | O5               | 2.9867(11) |
| C8   | C24  | 1.391(2)   | K1   | O6               | 2.8556(12) |
| C8   | O4   | 1.3716(19) | K1   | O7               | 2.8192(11) |
| C9   | C21  | 1.385(2)   | K1   | O8               | 3.0064(11) |
| C9   | O5   | 1.3828(19) | K1   | O9 <sup>1</sup>  | 2.8063(12) |
| C10  | C11  | 1.498(2)   | K1   | O10 <sup>1</sup> | 2.9594(12) |
| C10  | O5   | 1.4425(19) | K1   | S1 <sup>1</sup>  | 3.4129(5)  |
| C11  | O6   | 1.4247(19) | O9   | K1 <sup>1</sup>  | 2.8062(12) |
| C12  | C13  | 1.506(3)   | O9   | S1               | 1.4627(12) |
| C12  | O6   | 1.415(2)   | O10  | K1 <sup>1</sup>  | 2.9593(12) |
| C13  | O7   | 1.426(2)   | O10  | S1               | 1.4527(12) |
| C14  | C15  | 1.503(2)   | O11  | S1               | 1.4621(12) |
| C14  | O7   | 1.4247(18) | S1   | K1 <sup>1</sup>  | 3.4129(5)  |
| C15  | O8   | 1.4388(18) |      |                  |            |

<sup>1</sup>1-X,-Y,1-Z**Table 3S.** Values of valence angles for **SDB24C8-K<sup>+</sup>**.

| Atom | Atom | Atom | Angle/°    | Atom            | Atom | Atom             | Angle/°   |
|------|------|------|------------|-----------------|------|------------------|-----------|
| C17  | C1   | C16  | 120.01(13) | O6              | K1   | O5               | 58.79(3)  |
| O1   | C1   | C16  | 115.52(13) | O6              | K1   | O8               | 104.88(3) |
| O1   | C1   | C17  | 124.46(13) | O6              | K1   | O10 <sup>1</sup> | 97.19(3)  |
| O1   | C2   | C3   | 106.55(12) | O6              | K1   | S1 <sup>1</sup>  | 88.79(3)  |
| C2   | C3   | K1   | 94.96(9)   | O7              | K1   | C3               | 142.08(4) |
| O2   | C3   | C2   | 113.34(13) | O7              | K1   | O1               | 109.25(3) |
| O2   | C3   | K1   | 46.96(7)   | O7              | K1   | O4               | 81.62(3)  |
| O2   | C4   | C5   | 107.27(13) | O7              | K1   | O5               | 108.71(3) |
| O3   | C5   | C4   | 108.78(14) | O7              | K1   | O6               | 58.11(3)  |
| O3   | C6   | C7   | 114.07(14) | O7              | K1   | O8               | 59.51(3)  |
| O4   | C7   | C6   | 107.96(13) | O7              | K1   | O10 <sup>1</sup> | 145.79(3) |
| C24  | C8   | C9   | 119.42(15) | O7              | K1   | S1 <sup>1</sup>  | 123.00(3) |
| O4   | C8   | C9   | 116.14(14) | O8              | K1   | C3               | 90.17(3)  |
| O4   | C8   | C24  | 124.44(15) | O8              | K1   | O1               | 50.49(3)  |
| C21  | C9   | C8   | 119.90(15) | O8              | K1   | O4               | 131.14(3) |
| O5   | C9   | C8   | 117.98(13) | O8              | K1   | S1 <sup>1</sup>  | 92.71(2)  |
| O5   | C9   | C21  | 121.93(14) | O9 <sup>1</sup> | K1   | C3               | 94.82(4)  |

|     |     |                  |            |                  |     |                  |            |
|-----|-----|------------------|------------|------------------|-----|------------------|------------|
| O5  | C10 | C11              | 111.56(13) | O9 <sup>1</sup>  | K1  | O1               | 74.84(3)   |
| O6  | C11 | C10              | 108.35(13) | O9 <sup>1</sup>  | K1  | O3               | 158.96(4)  |
| O6  | C12 | C13              | 108.42(16) | O9 <sup>1</sup>  | K1  | O4               | 143.55(3)  |
| O7  | C13 | C12              | 107.34(15) | O9 <sup>1</sup>  | K1  | O5               | 96.01(3)   |
| O7  | C14 | C15              | 115.18(13) | O9 <sup>1</sup>  | K1  | O6               | 76.35(3)   |
| O8  | C15 | C14              | 108.21(12) | O9 <sup>1</sup>  | K1  | O7               | 98.41(3)   |
| C20 | C16 | C1               | 119.70(14) | O9 <sup>1</sup>  | K1  | O8               | 75.59(3)   |
| O8  | C16 | C1               | 115.64(13) | O9 <sup>1</sup>  | K1  | O10 <sup>1</sup> | 49.66(3)   |
| O8  | C16 | C20              | 124.59(14) | O9 <sup>1</sup>  | K1  | S1 <sup>1</sup>  | 24.84(2)   |
| C1  | C17 | C18              | 119.46(14) | O10 <sup>1</sup> | K1  | C3               | 63.92(4)   |
| C17 | C18 | S1               | 119.70(12) | O10 <sup>1</sup> | K1  | O1               | 77.28(3)   |
| C19 | C18 | C17              | 120.78(14) | O10 <sup>1</sup> | K1  | O4               | 115.70(3)  |
| C19 | C18 | S1               | 119.39(12) | O10 <sup>1</sup> | K1  | O5               | 69.29(3)   |
| C18 | C19 | C20              | 119.89(14) | O10 <sup>1</sup> | K1  | O8               | 113.00(3)  |
| C16 | C20 | C19              | 120.01(14) | O10 <sup>1</sup> | K1  | S1 <sup>1</sup>  | 25.08(2)   |
| C9  | C21 | C22              | 120.49(16) | S1 <sup>1</sup>  | K1  | C3               | 76.79(3)   |
| C23 | C22 | C21              | 119.58(16) | C1               | O1  | C2               | 116.63(12) |
| C22 | C23 | C24              | 120.60(16) | C1               | O1  | K1               | 126.13(8)  |
| C23 | C24 | C8               | 120.01(16) | C2               | O1  | K1               | 117.05(8)  |
| O1  | K1  | C3               | 41.39(3)   | C3               | O2  | K1               | 110.66(9)  |
| O1  | K1  | O4               | 139.84(3)  | C4               | O2  | C3               | 115.03(13) |
| O1  | K1  | S1 <sup>1</sup>  | 72.01(2)   | C4               | O2  | K1               | 117.19(9)  |
| O2  | K1  | C3               | 22.37(4)   | C5               | O3  | K1               | 115.57(9)  |
| O2  | K1  | O1               | 55.07(3)   | C6               | O3  | C5               | 114.25(13) |
| O2  | K1  | O3               | 59.65(3)   | C6               | O3  | K1               | 112.79(9)  |
| O2  | K1  | O4               | 87.87(3)   | C7               | O4  | K1               | 115.42(9)  |
| O2  | K1  | O5               | 101.28(3)  | C8               | O4  | C7               | 116.48(12) |
| O2  | K1  | O6               | 158.27(3)  | C8               | O4  | K1               | 122.88(9)  |
| O2  | K1  | O7               | 130.20(3)  | C9               | O5  | C10              | 115.84(12) |
| O2  | K1  | O8               | 95.34(3)   | C9               | O5  | K1               | 128.78(9)  |
| O2  | K1  | O9 <sup>1</sup>  | 117.19(3)  | C10              | O5  | K1               | 103.59(9)  |
| O2  | K1  | O10 <sup>1</sup> | 81.82(3)   | C11              | O6  | K1               | 120.64(9)  |
| O2  | K1  | S1 <sup>1</sup>  | 98.28(3)   | C12              | O6  | C11              | 112.69(13) |
| O3  | K1  | C3               | 80.51(4)   | C12              | O6  | K1               | 119.29(10) |
| O3  | K1  | O1               | 88.65(3)   | C13              | O7  | K1               | 111.89(11) |
| O3  | K1  | O4               | 56.19(3)   | C14              | O7  | C13              | 113.32(13) |
| O3  | K1  | O5               | 105.02(3)  | C14              | O7  | K1               | 112.49(9)  |
| O3  | K1  | O6               | 114.06(4)  | C15              | O8  | K1               | 115.45(8)  |
| O3  | K1  | O7               | 74.48(3)   | C16              | O8  | C15              | 115.87(11) |
| O3  | K1  | O8               | 83.88(3)   | C16              | O8  | K1               | 127.47(9)  |
| O3  | K1  | O10 <sup>1</sup> | 139.72(3)  | S1               | O9  | K1 <sup>1</sup>  | 101.48(6)  |
| O3  | K1  | S1 <sup>1</sup>  | 157.03(3)  | S1               | O10 | K1 <sup>1</sup>  | 95.21(5)   |
| O4  | K1  | C3               | 107.45(4)  | C18              | S1  | K1 <sup>1</sup>  | 111.87(5)  |
| O4  | K1  | S1 <sup>1</sup>  | 135.13(2)  | O9               | S1  | C18              | 105.74(7)  |
| O5  | K1  | C3               | 104.99(4)  | O9               | S1  | K1 <sup>1</sup>  | 53.69(5)   |
| O5  | K1  | O1               | 141.85(3)  | O10              | S1  | C18              | 106.82(7)  |
| O5  | K1  | O4               | 51.00(3)   | O10              | S1  | K1 <sup>1</sup>  | 59.71(5)   |
| O5  | K1  | O8               | 163.38(3)  | O10              | S1  | O9               | 112.58(7)  |
| O5  | K1  | S1 <sup>1</sup>  | 84.35(2)   | O10              | S1  | O11              | 112.90(7)  |
| O6  | K1  | C3               | 159.71(4)  | O11              | S1  | C18              | 105.56(7)  |
| O6  | K1  | O1               | 146.09(3)  | O11              | S1  | K1 <sup>1</sup>  | 142.38(5)  |

---

|    |    |    |          |     |    |    |           |
|----|----|----|----------|-----|----|----|-----------|
| O6 | K1 | O4 | 72.92(3) | O11 | S1 | O9 | 112.53(7) |
|----|----|----|----------|-----|----|----|-----------|

---

<sup>1</sup>1-X,-Y,1-Z

**Table 4S.** Values of torsion angles for **SDB24C8<sup>-</sup>K<sup>+</sup>**.

| A   | B   | C   | D   | Angle/°     | A               | B   | C   | D               | Angle/°     |
|-----|-----|-----|-----|-------------|-----------------|-----|-----|-----------------|-------------|
| C1  | C16 | C20 | C19 | -3.4(2)     | C17             | C18 | C19 | C20             | 2.9(2)      |
| C1  | C16 | O8  | C15 | 169.99(12)  | C17             | C18 | S1  | K1 <sup>1</sup> | 83.61(12)   |
| C1  | C16 | O8  | K1  | -23.29(17)  | C17             | C18 | S1  | O9              | 26.96(14)   |
| C1  | C17 | C18 | C19 | -2.0(2)     | C17             | C18 | S1  | O10             | 147.10(12)  |
| C1  | C17 | C18 | S1  | 173.86(11)  | C17             | C18 | S1  | O11             | -92.49(13)  |
| C2  | C3  | O2  | C4  | -61.55(18)  | C18             | C19 | C20 | C16             | -0.2(2)     |
| C2  | C3  | O2  | K1  | 74.10(15)   | C19             | C18 | S1  | K1 <sup>1</sup> | -100.51(12) |
| C3  | C2  | O1  | C1  | 177.49(13)  | C19             | C18 | S1  | O9              | -157.16(12) |
| C3  | C2  | O1  | K1  | 2.25(16)    | C19             | C18 | S1  | O10             | -37.03(14)  |
| C4  | C5  | O3  | C6  | 176.60(13)  | C19             | C18 | S1  | O11             | 83.38(13)   |
| C4  | C5  | O3  | K1  | 43.26(16)   | C20             | C16 | O8  | C15             | -6.8(2)     |
| C5  | C4  | O2  | C3  | -174.01(13) | C20             | C16 | O8  | K1              | 159.96(11)  |
| C5  | C4  | O2  | K1  | 53.32(15)   | C21             | C9  | O5  | C10             | 61.4(2)     |
| C6  | C7  | O4  | C8  | 173.64(13)  | C21             | C9  | O5  | K1              | -162.27(12) |
| C6  | C7  | O4  | K1  | 18.39(16)   | C21             | C22 | C23 | C24             | -0.7(3)     |
| C7  | C6  | O3  | C5  | -64.74(18)  | C22             | C23 | C24 | C8              | 0.2(3)      |
| C7  | C6  | O3  | K1  | 69.90(14)   | C24             | C8  | C9  | C21             | -0.8(2)     |
| C8  | C9  | C21 | C22 | 0.3(3)      | C24             | C8  | C9  | O5              | -175.94(14) |
| C8  | C9  | O5  | C10 | -123.62(15) | C24             | C8  | O4  | C7              | 9.5(2)      |
| C8  | C9  | O5  | K1  | 12.75(19)   | C24             | C8  | O4  | K1              | 162.75(12)  |
| C9  | C8  | C24 | C23 | 0.6(2)      | K1              | C3  | O2  | C4              | -135.65(14) |
| C9  | C8  | O4  | C7  | -170.34(14) | K1 <sup>1</sup> | O9  | S1  | C18             | 105.85(6)   |
| C9  | C8  | O4  | K1  | -17.10(18)  | K1 <sup>1</sup> | O9  | S1  | O10             | -10.44(8)   |
| C9  | C21 | C22 | C23 | 0.5(3)      | K1 <sup>1</sup> | O9  | S1  | O11             | -139.40(6)  |
| C10 | C11 | O6  | C12 | -176.01(15) | K1 <sup>1</sup> | O10 | S1  | C18             | -105.90(6)  |
| C10 | C11 | O6  | K1  | -26.23(17)  | K1 <sup>1</sup> | O10 | S1  | O9              | 9.74(7)     |
| C11 | C10 | O5  | C9  | 80.48(16)   | K1 <sup>1</sup> | O10 | S1  | O11             | 138.51(6)   |
| C11 | C10 | O5  | K1  | -65.93(13)  | O1              | C1  | C16 | C20             | -177.10(13) |
| C12 | C13 | O7  | C14 | -168.05(16) | O1              | C1  | C16 | O8              | 5.98(18)    |
| C12 | C13 | O7  | K1  | 63.48(19)   | O1              | C1  | C17 | C18             | 179.89(13)  |
| C13 | C12 | O6  | C11 | -178.42(16) | O1              | C2  | C3  | K1              | -1.76(12)   |
| C13 | C12 | O6  | K1  | 31.4(2)     | O1              | C2  | C3  | O2              | -46.64(18)  |
| C14 | C15 | O8  | C16 | -159.98(12) | O2              | C4  | C5  | O3              | -62.54(17)  |
| C14 | C15 | O8  | K1  | 31.66(14)   | O3              | C6  | C7  | O4              | -57.00(18)  |
| C15 | C14 | O7  | C13 | -69.52(19)  | O4              | C8  | C9  | C21             | 179.05(14)  |
| C15 | C14 | O7  | K1  | 58.65(15)   | O4              | C8  | C9  | O5              | 3.9(2)      |
| C16 | C1  | C17 | C18 | -1.6(2)     | O4              | C8  | C24 | C23             | -179.26(15) |
| C16 | C1  | O1  | C2  | -162.19(13) | O5              | C9  | C21 | C22             | 175.22(15)  |
| C16 | C1  | O1  | K1  | 12.57(17)   | O5              | C10 | C11 | O6              | 65.07(17)   |
| C17 | C1  | C16 | C20 | 4.3(2)      | O6              | C12 | C13 | O7              | -62.0(2)    |
| C17 | C1  | C16 | O8  | -172.64(12) | O7              | C14 | C15 | O8              | -61.31(17)  |
| C17 | C1  | O1  | C2  | 16.4(2)     | O8              | C16 | C20 | C19             | 173.25(13)  |
| C17 | C1  | O1  | K1  | -168.88(10) | S1              | C18 | C19 | C20             | -172.96(12) |

---

<sup>1</sup>1-X,-Y,1-Z

**Table 5S.** Bond lengths for **SDB24C8<sup>-</sup>H<sub>3</sub>O<sup>+</sup>**.

| Atom | Atom | Length/Å  | Atom | Atom | Length/Å   |
|------|------|-----------|------|------|------------|
| C1   | C16  | 1.404(2)  | C9   | O5   | 1.390(2)   |
| C1   | C17  | 1.386(3)  | C10  | C11  | 1.499(3)   |
| C1   | O1   | 1.377(2)  | C10  | O5   | 1.436(2)   |
| C2A  | C3A  | 1.536(2)  | C11  | O6   | 1.420(2)   |
| C2A  | O1   | 1.446(9)  | C12  | C13A | 1.494(5)   |
| C2B  | C3B  | 1.505(9)  | C12  | C13B | 1.464(5)   |
| C2B  | O1   | 1.448(10) | C12  | O6   | 1.413(2)   |
| C3A  | O2A  | 1.429(4)  | C13A | O7A  | 1.436(6)   |
| C3B  | O2B  | 1.439(5)  | C13B | O7B  | 1.436(7)   |
| C4A  | C5A  | 1.513(8)  | C14  | C15  | 1.479(3)   |
| C4A  | O2A  | 1.411(6)  | C14  | O7A  | 1.431(3)   |
| C4B  | C5B  | 1.509(6)  | C14  | O7B  | 1.467(4)   |
| C4B  | O2B  | 1.404(9)  | C15  | O8   | 1.438(2)   |
| C5A  | O3A  | 1.426(8)  | C16  | C20  | 1.387(3)   |
| C5B  | O3B  | 1.427(6)  | C16  | O8   | 1.369(2)   |
| C6A  | C7A  | 1.510(7)  | C17  | C18  | 1.392(3)   |
| C6A  | O3A  | 1.420(7)  | C18  | C19  | 1.384(3)   |
| C6B  | C7B  | 1.495(7)  | C18  | S1   | 1.7790(19) |
| C6B  | O3B  | 1.441(6)  | C19  | C20  | 1.394(3)   |
| C7A  | O4   | 1.561(5)  | C21  | C22  | 1.396(3)   |
| C7B  | O4   | 1.382(5)  | C22  | C23  | 1.366(4)   |
| C8   | C9   | 1.393(3)  | C23  | C24  | 1.388(4)   |
| C8   | C24  | 1.399(3)  | O9   | S1   | 1.4568(13) |
| C8   | O4   | 1.368(3)  | O10  | S1   | 1.4595(14) |
| C9   | C21  | 1.386(3)  | O11  | S1   | 1.4578(14) |

**Table 6S.** Values of valence angles for **SDB24C8-H<sub>3</sub>O<sup>+</sup>**.

| Atom | Atom | Atom | Angle/°    | Atom | Atom | Atom | Angle/°    |
|------|------|------|------------|------|------|------|------------|
| C17  | C1   | C16  | 120.37(17) | O8   | C16  | C1   | 116.29(17) |
| O1   | C1   | C16  | 114.94(16) | O8   | C16  | C20  | 124.17(16) |
| O1   | C1   | C17  | 124.69(16) | C1   | C17  | C18  | 119.50(16) |
| O1   | C2A  | C3A  | 102.8(4)   | C17  | C18  | S1   | 120.98(14) |
| O1   | C2B  | C3B  | 107.2(6)   | C19  | C18  | C17  | 120.33(17) |
| O2A  | C3A  | C2A  | 114.4(4)   | C19  | C18  | S1   | 118.52(15) |
| O2B  | C3B  | C2B  | 108.1(4)   | C18  | C19  | C20  | 120.22(18) |
| O2A  | C4A  | C5A  | 107.1(5)   | C16  | C20  | C19  | 119.90(17) |
| O2B  | C4B  | C5B  | 108.6(5)   | C9   | C21  | C22  | 120.3(2)   |
| O3A  | C5A  | C4A  | 107.1(5)   | C23  | C22  | C21  | 119.9(2)   |
| O3B  | C5B  | C4B  | 108.0(5)   | C22  | C23  | C24  | 120.4(2)   |
| O3A  | C6A  | C7A  | 114.7(5)   | C23  | C24  | C8   | 120.4(2)   |
| O3B  | C6B  | C7B  | 115.1(4)   | C1   | O1   | C2A  | 109.3(2)   |
| C6A  | C7A  | O4   | 111.6(3)   | C1   | O1   | C2B  | 128.1(3)   |
| O4   | C7B  | C6B  | 103.7(4)   | C4A  | O2A  | C3A  | 115.0(3)   |
| C9   | C8   | C24  | 119.0(2)   | C4B  | O2B  | C3B  | 113.0(4)   |
| O4   | C8   | C9   | 116.50(17) | C6A  | O3A  | C5A  | 114.7(5)   |
| O4   | C8   | C24  | 124.5(2)   | C5B  | O3B  | C6B  | 112.8(4)   |
| C21  | C9   | C8   | 119.97(19) | C8   | O4   | C7A  | 117.5(2)   |
| C21  | C9   | O5   | 121.17(19) | C8   | O4   | C7B  | 112.1(2)   |
| O5   | C9   | C8   | 118.67(17) | C9   | O5   | C10  | 115.50(14) |
| O5   | C10  | C11  | 112.56(15) | C12  | O6   | C11  | 113.17(14) |

|     |      |      |            |      |     |      |            |
|-----|------|------|------------|------|-----|------|------------|
| O6  | C11  | C10  | 107.93(15) | C14  | O7A | C13A | 109.4(3)   |
| O6  | C12  | C13A | 106.6(2)   | C13B | O7B | C14  | 108.4(4)   |
| O6  | C12  | C13B | 114.5(2)   | C16  | O8  | C15  | 116.89(14) |
| O7A | C13A | C12  | 108.3(4)   | O9   | S1  | C18  | 106.20(8)  |
| O7B | C13B | C12  | 109.2(4)   | O9   | S1  | O10  | 112.78(8)  |
| O7A | C14  | C15  | 124.1(2)   | O9   | S1  | O11  | 113.86(8)  |
| O7B | C14  | C15  | 97.7(2)    | O10  | S1  | C18  | 106.19(8)  |
| O8  | C15  | C14  | 109.29(16) | O11  | S1  | C18  | 105.10(8)  |
| C20 | C16  | C1   | 119.51(17) | O11  | S1  | O10  | 111.92(8)  |

**Table 7S.** Values of torsion angles for **SDB24C8-H<sub>3</sub>O<sup>+</sup>**.

| A    | B    | C   | D    | Angle/°     | A   | B   | C    | D   | Angle/°     |
|------|------|-----|------|-------------|-----|-----|------|-----|-------------|
| C1   | C16  | C20 | C19  | -3.2(3)     | C17 | C1  | O1   | C2B | 20.4(5)     |
| C1   | C16  | O8  | C15  | 167.52(15)  | C17 | C18 | C19  | C20 | 3.1(3)      |
| C1   | C17  | C18 | C19  | -2.2(3)     | C17 | C18 | S1   | O9  | 25.79(16)   |
| C1   | C17  | C18 | S1   | 172.97(13)  | C17 | C18 | S1   | O10 | 146.06(14)  |
| C2A  | C3A  | O2A | C4A  | -55.7(5)    | C17 | C18 | S1   | O11 | -95.19(15)  |
| C2B  | C3B  | O2B | C4B  | -174.0(6)   | C18 | C19 | C20  | C16 | -0.4(3)     |
| C3A  | C2A  | O1  | C1   | 175.7(3)    | C19 | C18 | S1   | O9  | -158.94(14) |
| C3B  | C2B  | O1  | C1   | 91.6(4)     | C19 | C18 | S1   | O10 | -38.66(16)  |
| C4A  | C5A  | O3A | C6A  | 175.4(5)    | C19 | C18 | S1   | O11 | 80.09(16)   |
| C4B  | C5B  | O3B | C6B  | -170.3(5)   | C20 | C16 | O8   | C15 | -10.5(2)    |
| C5A  | C4A  | O2A | C3A  | -177.7(4)   | C21 | C9  | O5   | C10 | 69.7(2)     |
| C5B  | C4B  | O2B | C3B  | -179.4(4)   | C21 | C22 | C23  | C24 | 0.2(3)      |
| C6A  | C7A  | O4  | C8   | 165.2(4)    | C22 | C23 | C24  | C8  | -1.7(3)     |
| C6B  | C7B  | O4  | C8   | 172.7(3)    | C24 | C8  | C9   | C21 | -0.7(3)     |
| C7A  | C6A  | O3A | C5A  | -69.5(6)    | C24 | C8  | C9   | O5  | -175.80(18) |
| C7B  | C6B  | O3B | C5B  | -54.6(5)    | C24 | C8  | O4   | C7A | 21.5(4)     |
| C8   | C9   | C21 | C22  | -0.7(3)     | C24 | C8  | O4   | C7B | -9.2(4)     |
| C8   | C9   | O5  | C10  | -115.32(19) | O1  | C1  | C16  | C20 | -175.36(15) |
| C9   | C8   | C24 | C23  | 2.0(3)      | O1  | C1  | C16  | O8  | 6.5(2)      |
| C9   | C8   | O4  | C7A  | -157.3(3)   | O1  | C1  | C17  | C18 | 178.00(15)  |
| C9   | C8   | O4  | C7B  | 172.0(3)    | O1  | C2A | C3A  | O2A | -51.9(6)    |
| C9   | C21  | C22 | C23  | 1.0(3)      | O1  | C2B | C3B  | O2B | 66.0(5)     |
| C10  | C11  | O6  | C12  | -178.67(17) | O2A | C4A | C5A  | O3A | -61.3(6)    |
| C11  | C10  | O5  | C9   | 76.7(2)     | O2B | C4B | C5B  | O3B | -58.1(6)    |
| C12  | C13A | O7A | C14  | -171.1(3)   | O3A | C6A | C7A  | O4  | -63.5(6)    |
| C12  | C13B | O7B | C14  | -168.5(3)   | O3B | C6B | C7B  | O4  | -50.1(5)    |
| C13A | C12  | O6  | C11  | -174.6(3)   | O4  | C8  | C9   | C21 | 178.13(18)  |
| C13B | C12  | O6  | C11  | 148.2(3)    | O4  | C8  | C9   | O5  | 3.1(3)      |
| C14  | C15  | O8  | C16  | -158.44(16) | O4  | C8  | C24  | C23 | -176.8(2)   |
| C15  | C14  | O7A | C13A | -77.9(4)    | O5  | C9  | C21  | C22 | 174.20(18)  |
| C15  | C14  | O7B | C13B | -174.2(3)   | O5  | C10 | C11  | O6  | 66.0(2)     |
| C16  | C1   | C17 | C18  | -1.4(3)     | O6  | C12 | C13A | O7A | -62.2(4)    |
| C16  | C1   | O1  | C2A  | -164.6(4)   | O6  | C12 | C13B | O7B | 56.4(5)     |
| C16  | C1   | O1  | C2B  | -160.2(4)   | O7A | C14 | C15  | O8  | -51.6(3)    |
| C17  | C1   | C16 | C20  | 4.0(3)      | O7B | C14 | C15  | O8  | -79.4(2)    |
| C17  | C1   | C16 | O8   | -174.06(15) | O8  | C16 | C20  | C19 | 174.78(16)  |
| C17  | C1   | O1  | C2A  | 16.0(4)     | S1  | C18 | C19  | C20 | -172.21(14) |

**Table 8S.** Parameters describing selected geometrical features of SDB24C8<sup>-K<sup>+</sup></sup>, SDB24C8<sup>-H<sub>3</sub>O<sup>+</sup></sup> and [K(DB24C8)(DME)]<sub>2</sub>C<sub>60</sub>·DME.\*

| Geometrical parameter [Å, °] | SDB24C8 <sup>-K<sup>+</sup></sup> | SDB24C8 <sup>-H<sub>3</sub>O<sup>+</sup></sup> | [K(DB24C8)(DME)] <sub>2</sub> C <sub>60</sub> ·DME |           |
|------------------------------|-----------------------------------|------------------------------------------------|----------------------------------------------------|-----------|
| d(Cg1...Cg2)                 | 10.24(2)                          | 10.23(2)                                       | 9.59(2)                                            |           |
| d(CgI...CgJ)                 | d(Cg1...Cg1 <sup>i</sup> )        | 4.43(2)                                        | 4.31(2)                                            | –         |
|                              | d(Cg2...Cg2 <sup>i</sup> )        | 19.42(2)                                       | 19.53(2)                                           | –         |
|                              | <(Cg1...Cg2)                      | 74.04(6)                                       | 72.54(7)                                           | 51.04(15) |
| <(CgI...CgJ)                 | <(Cg1...Cg1 <sup>i</sup> )        | 0.0(4)                                         | 0.0(4)                                             | –         |
|                              | <(Cg1...Cg1 <sup>i</sup> )        | 0.0(2)                                         | 0.0(4)                                             | –         |

Where: d(CgI...CgJ) and <(CgI...CgJ) – distance between the centers of gravity and the angle between planes of the phenyl rings within the DB24C8 moiety and the [K(SDB24C8)]<sub>2</sub> / [H<sub>3</sub>O(SDB24C8)]<sub>2</sub> assemblies (see Fig. 1). Symmetry codes: (i) (SDB24C8<sup>-K<sup>+</sup></sup>) -x + 1, -y, -z + 1; (i) (SDB24C8<sup>-H<sub>3</sub>O<sup>+</sup></sup>) -x + 1, -y + 2, -z + 1.

\*Data for [K(DB24C8)(DME)]<sub>2</sub>C<sub>60</sub>·DME sourced from N. V. Kozhemyakina et al., *Eur. J. Inorg. Chem.*, 2009, 3900–3903.

**Table 9S.** Geometrical parameters of hydrogen bonds in the crystal of SDB24C8<sup>-K<sup>+</sup></sup>.

| D–H...A                       | D–H [Å] | d(H...A) [Å] | d(D...A) [Å] | <(D–H...A) [°] |
|-------------------------------|---------|--------------|--------------|----------------|
| O2W–H2WA...O11                | 0.85(3) | 2.01(3)      | 2.852(2)     | 172(3)         |
| O2W–H2WB...O1W <sup>ii</sup>  | 0.88(3) | 1.93(3)      | 2.805(7)     | 173(3)         |
| O2W–H2WB...O1WA <sup>ii</sup> | 0.88(3) | 1.96(3)      | 2.808(8)     | 163(3)         |
| O1W–H1WA...O1W <sup>ii</sup>  | 0.84(5) | 1.99(5)      | 2.828(13)    | 176(5)         |
| O1W–H1WA...O1WA <sup>ii</sup> | 0.84(5) | 2.01(5)      | 2.818(12)    | 164(4)         |
| O1W–H1WB...O9                 | 0.85(3) | 2.01(3)      | 2.846(6)     | 171(7)         |
| C15–H15A...O2W <sup>iii</sup> | 0.97    | 2.42         | 3.053(2)     | 122            |
| C22–H22...O1W <sup>iv</sup>   | 0.93    | 2.58         | 3.261(13)    | 130            |

Symmetry codes: (ii) -x + 1, -y, -z + 2; (iii) -x + 2, -y, -z + 1; (iv) -x, -y + 1, -z + 1.

**Table 10S.** Geometrical parameters of the C–H...π contacts in the crystal of SDB24C8<sup>-K<sup>+</sup></sup>.

| D–H    | CgJ            | d(H...CgJ) [Å] | d(D...CgJ) [Å] | <(C–H...CgJ) [°] |
|--------|----------------|----------------|----------------|------------------|
| C5–H5B | 1 <sup>v</sup> | 2.93           | 3.791(2)       | 148              |

Cg1 denotes the geometric centre of gravity of the aromatic ring delineated by the C1/C16/C20–C17 atoms (Fig. 1S). Symmetry code: (v) -x + 1, -y + 1, -z + 1.

**Table 11S.** Geometrical parameters of hydrogen bonds in the crystal of SDB24C8<sup>-H<sub>3</sub>O<sup>+</sup></sup>.

| D–H...A                       | D–H [Å] | d(H...A) [Å] | d(D...A) [Å] | <(D–H...A) [°] |
|-------------------------------|---------|--------------|--------------|----------------|
| O1W–H1W...O1                  | 0.93(5) | 2.51(5)      | 2.973(2)     | 111(4)         |
| O1W–H1W...O8                  | 0.93(5) | 2.13(5)      | 3.031(2)     | 162(4)         |
| O1W–H1WA...O2A                | 0.94(2) | 2.15(2)      | 2.844(3)     | 130(2)         |
| O1W–H1WA...O3A                | 0.94(2) | 2.10(3)      | 2.952(6)     | 150(2)         |
| O1W–H1WA...O2B                | 0.94(2) | 2.21(2)      | 3.043(4)     | 147.4(19)      |
| O1W–H1WA...O3B                | 0.94(2) | 2.37(3)      | 3.117(6)     | 136.2(19)      |
| O1W–H1WB...O9 <sup>i</sup>    | 0.95(2) | 2.58(2)      | 2.996(2)     | 106.7(15)      |
| O1W–H1WB...O10 <sup>i</sup>   | 0.95(2) | 1.95(2)      | 2.884(2)     | 169(2)         |
| O1W–H1WC...O6                 | 0.91(2) | 2.04(2)      | 2.928(2)     | 164(4)         |
| O1W–H1WC...O7A                | 0.91(2) | 2.42(5)      | 2.895(3)     | 112(4)         |
| C11–H11A...O9 <sup>ii</sup>   | 0.97    | 2.53         | 3.439(2)     | 156            |
| C12–H12B...O11 <sup>iii</sup> | 0.97    | 2.56         | 3.318(2)     | 135            |
| C7A–H7AA...O11 <sup>iii</sup> | 0.97    | 2.40         | 3.084(6)     | 127            |

Symmetry codes: (i) -x + 1, -y + 2, -z + 1; (ii) x, y - 1, z + 1; (iii) -x + 2, -y + 1, -z + 1.

**Table 12S.** Geometrical parameters of the C–H...π contacts in the crystal of SDB24C8<sup>-H<sub>3</sub>O<sup>+</sup></sup>.

| D–H      | CgJ              | d(H...CgJ) [Å] | d(D...CgJ) [Å] | <(C–H...CgJ) [°] |
|----------|------------------|----------------|----------------|------------------|
| C2B–H2BA | 2 <sup>iv</sup>  | 2.93           | 3.766(9)       | 145              |
| C5B–H5BB | 1 <sup>iii</sup> | 2.62           | 3.555(6)       | 162              |

Cg1 and Cg2 denote the geometric centres of gravity of the aromatic rings delineated by the C1/C16/C20–C17 and C8–C9/C21–C24 atoms, respectively (Fig. 2S). Symmetry codes: (iii) -x + 2, -y + 1, -z + 1; (iv) -x + 1, -y + 1, -z + 1.
